# Supplementary material for: Chemopreventive Property of Sencha Tea Extracts towards Sensitive and Multidrug-Resistant Leukemia and Multiple Myeloma Cells
Source: PubMed Central journal article supplement (PMC7407630; doi:10.3390/biom10071000), 2020-07-04
Supplement: biomolecules-10-01000-s001.pdf [file biomolecules-10-01000-s001.pdf]

# Chemopreventive property of Sencha tea extracts towards sensitive and multidrug-resistant leukemia and multiple myeloma cells

## (Supplementary Materials)

Xiaohua Lu <sup>1</sup>, Mohamed E. M. Saeed <sup>1</sup>, Mohamed-Elamir F. Hegazy <sup>1,2</sup>, Christopher J. Kampf <sup>3</sup>, and Thomas Efferth <sup>1,\*</sup>

<sup>1</sup> Department of Pharmaceutical Biology, Institute of Pharmacy and Biochemistry, Johannes Gutenberg University, Staudinger Weg 5, 55128 Mainz, Germany; xiaohulu@uni-mainz.de (X.L.); saeedm@uni-mainz.de (M.E.M.S.); elamir77@live.com (M.E.F.H.)

<sup>2</sup> Chemistry of Medicinal Plants Department, National Research Centre, 33 El-Bohouth St., Dokki, Giza 12622, Egypt

<sup>3</sup> Department for Chemistry, Johannes Gutenberg University Mainz, Duesbergweg 10-14, 55128 Mainz, Germany; kampfc@uni-mainz.de

\* Correspondence: efferth@uni-mainz.de; Tel.: +49-6131-392-5751; Fax: +49-6131-392-3752

### 1. Supplementary Figures (Figure S1-S6)

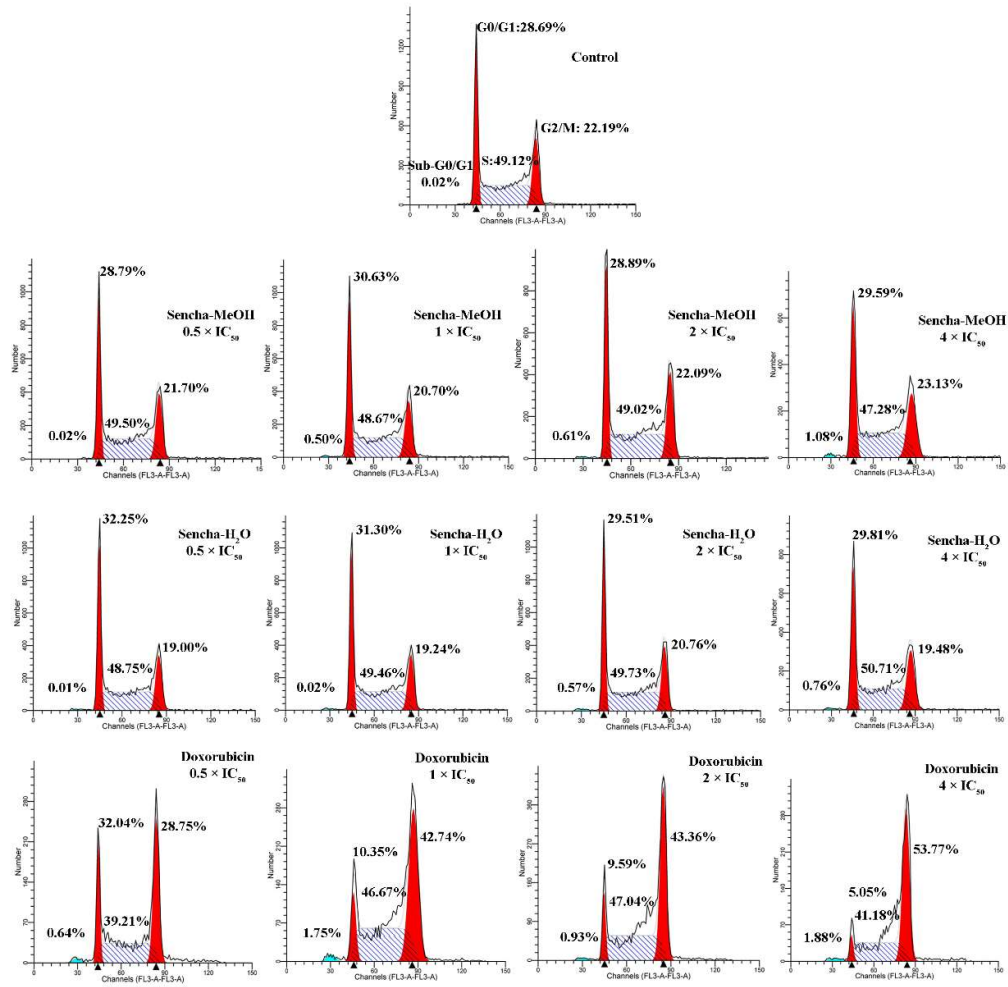

**Figure S1.** Distribution of cell cycle of CCRF/CEM upon 24 h treatment with sencha-MeOH extract, sencha-H<sub>2</sub>O extracts, doxorubicin at a set of concentrations. IC<sub>50</sub> values were 8.38 µg/mL for sencha-MeOH extract, 11.50 µg/mL for sencha-H<sub>2</sub>O extract, 0.0093 µM for doxorubicin towards CCRF/CEM cells.

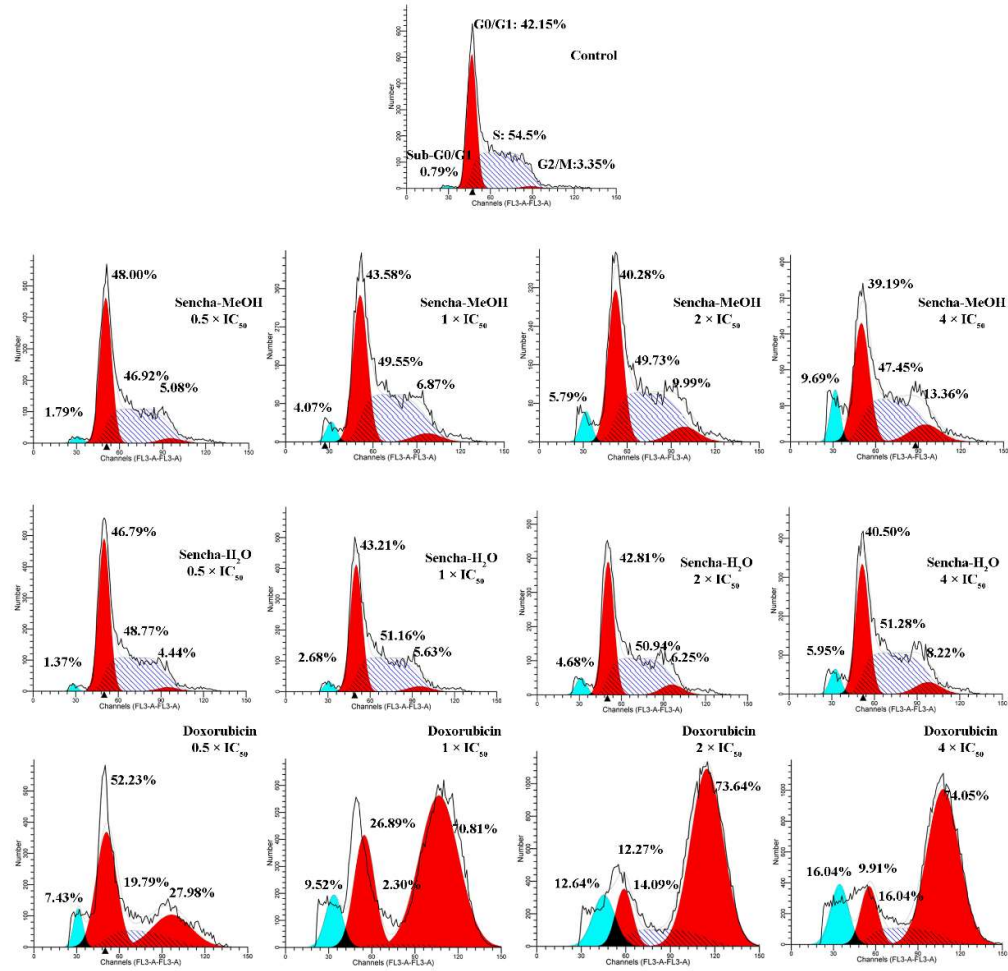

**Figure S2.** Distribution of cell cycle of CCRF/CEM upon 48 h treatment with sencha-MeOH extract, sencha-H<sub>2</sub>O extracts, doxorubicin at a set of concentrations. IC<sub>50</sub> values were 8.38 μg/mL for sencha-MeOH extract, 11.50 μg/mL for sencha-H<sub>2</sub>O extract, 0.0093 μM for doxorubicin towards CCRF/CEM cells.

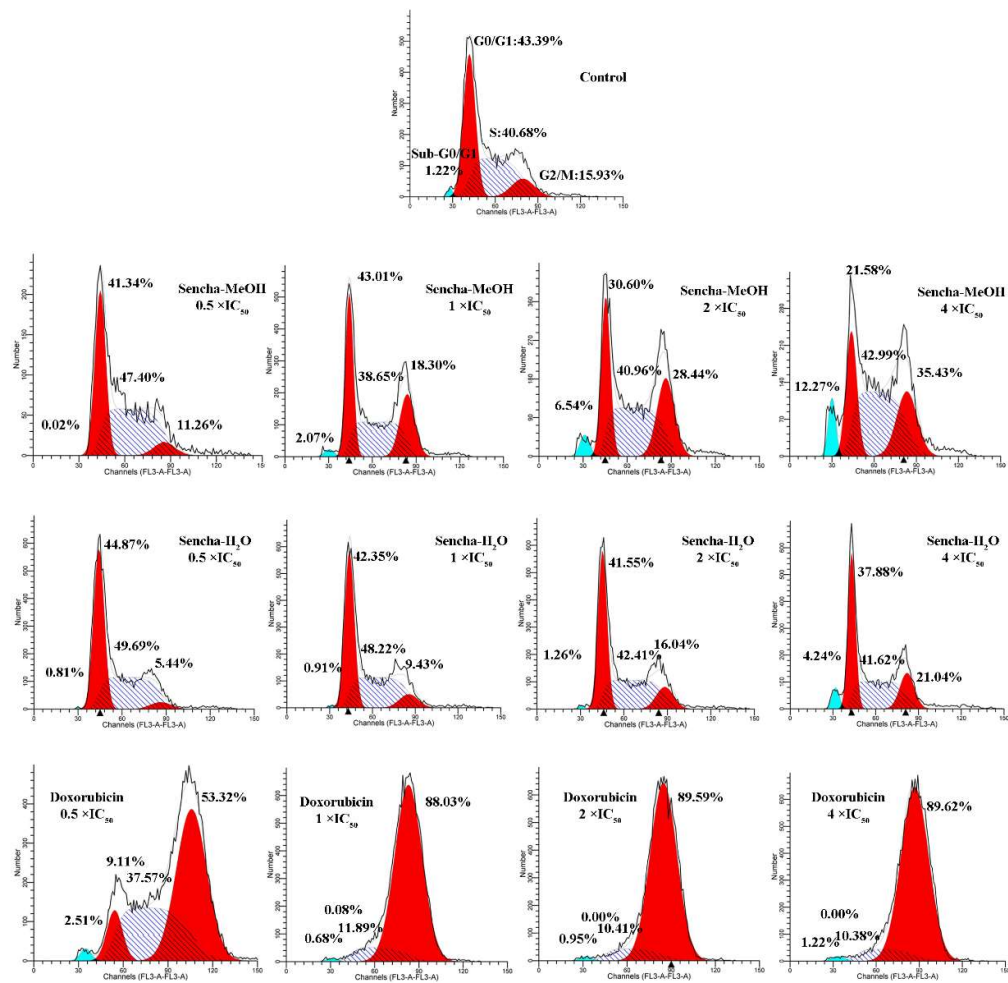

**Figure S3.** Distribution of cell cycle of CCRF/CEM upon 72 h treatment with sencha-MeOH extract, sencha-H<sub>2</sub>O extracts, doxorubicin at a set of concentrations. IC<sub>50</sub> values were 8.38 μg/mL for sencha-MeOH extract, 11.50 μg/mL for sencha-H<sub>2</sub>O extract, 0.0093 μM for doxorubicin towards CCRF/CEM cells.

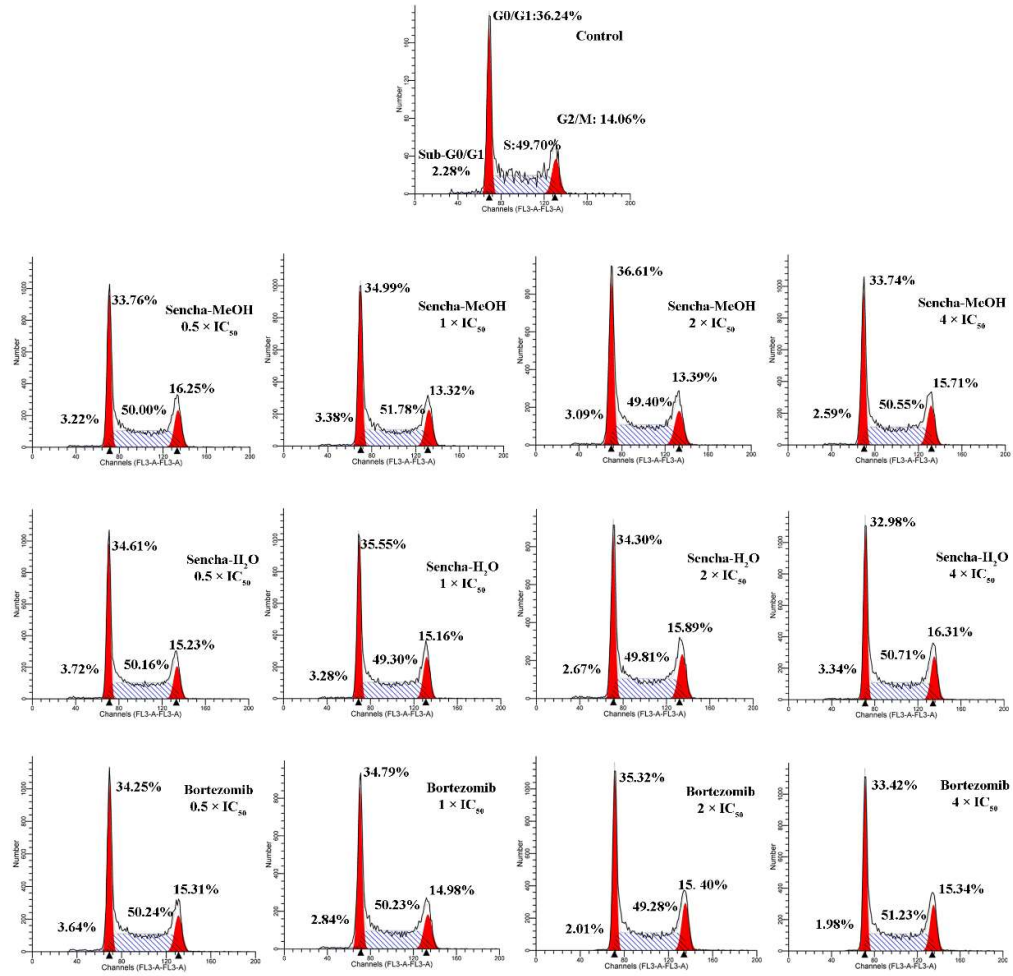

**Figure S4.** Distribution of cell cycle of KMS-12-BM upon 24 h treatment with sencha-MeOH extract, sencha-H<sub>2</sub>O extracts and bortezomib at a set of concentrations. IC<sub>50</sub> values were 11.37 µg/mL for sencha-MeOH extract, 14.85 µg/mL for sencha-H<sub>2</sub>O extract, 0.0019 µM for bortezomib towards KMS-12-BM cells.

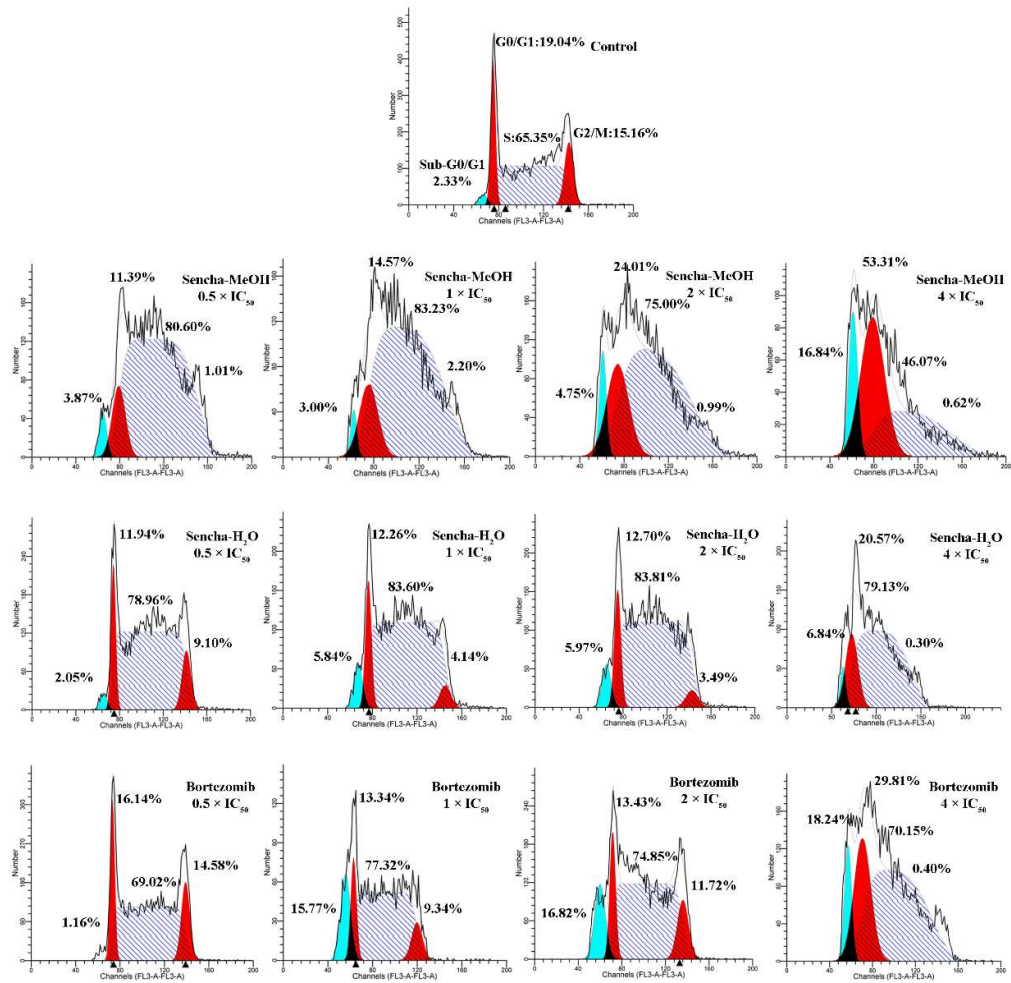

**Figure S5.** Distribution of cell cycle of KMS-12-BM upon 48 h treatment with sencha-MeOH extract, sencha-H<sub>2</sub>O extracts and bortezomib at a set of concentrations. IC<sub>50</sub> values were 11.37 µg/mL for sencha-MeOH extract, 14.85 µg/mL for sencha-H<sub>2</sub>O extract, 0.0019 µM for bortezomib towards KMS-12-BM cells.

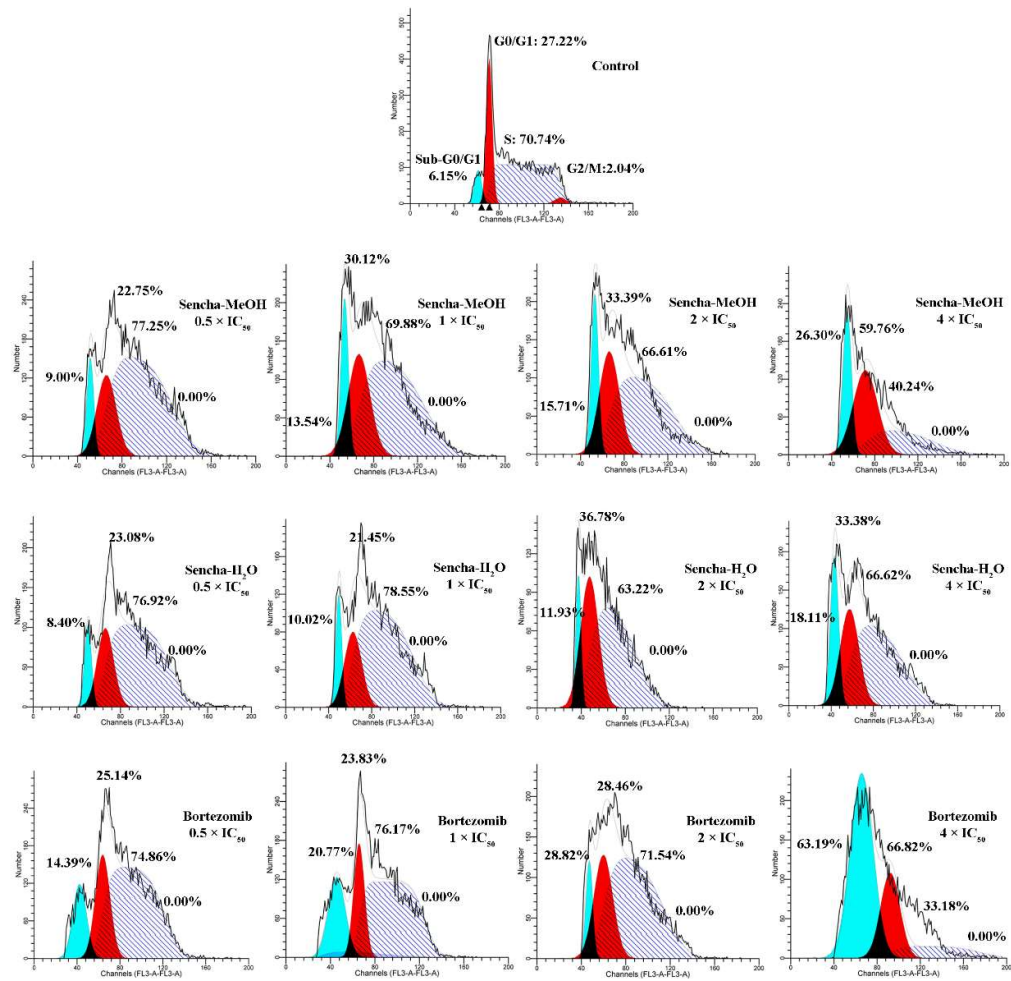

**Figure S6.** Distribution of cell cycle of KMS-12-BM upon 72 h treatment with sencha-MeOH extract, sencha-H<sub>2</sub>O extracts and bortezomib at a set of concentrations. IC<sub>50</sub> values were 11.37 µg/mL for sencha-MeOH extract, 14.85 µg/mL for sencha-H<sub>2</sub>O extract, 0.0019 µM for bortezomib towards KMS-12-BM cells.
